# Supplementary material for: Double-stranded DNA in exosomes: a novel biomarker in cancer detection
Source: PubMed Central journal article supplement — Cell Res. 2014 Apr 8;24(6):766–9. doi: 10.1038/cr.2014.44 (PMC4042169; doi:10.1038/cr.2014.44), 2014-04-08
Supplement: cr201444x3.pdf [file cr201444x3.pdf]

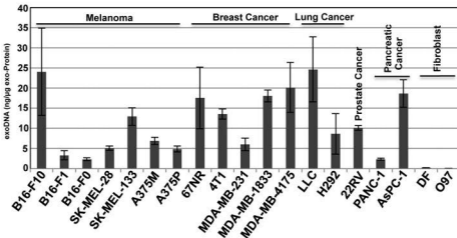

Supplementary information, Figure S3 DNA is present in tumor cell-derived exosomes. DNA was extracted from exosomes secreted by different types of cancer cell lines, including melanoma (B16-F10, B16-F1, B16-F0, SK-MEL-28, SK-MEL-133, A375M and A375P), breast cancer (67NR, 4T1, MDA-MB-231, MDA-MB-1833 and MDA-MB-4175), lung cancer (LLC and H292), prostate cancer (22RV), and pancreatic cancer (PANC-1 and AsPC-1). DNA abundance was expressed as “nanogram of DNA per microgram of exoProtein”. DNA abundance was also evaluated for exosomes derived from two normal human primary stromal fibroblast cell lines, DF and O97. Experiments were performed in duplication and results are shown as mean  $\pm$  standard errors (n=2, except for DF and O97 for which multiple preparations of exosomes were pooled together due to their extremely low yield to extract DNA).
