# Supplementary material for: Double-stranded DNA in exosomes: a novel biomarker in cancer detection
Source: PubMed Central journal article supplement — Cell Res. 2014 Apr 8;24(6):766–9. doi: 10.1038/cr.2014.44 (PMC4042169; doi:10.1038/cr.2014.44), 2014-04-08
Supplement: cr201444x4.pdf [file cr201444x4.pdf]

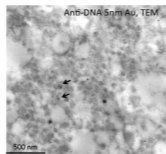

Supplementary information, Figure S4 Detection of DNA in B16-F10 exosomes by immunogold EM. The small grey areas represent exosomes (\*) and the solid black dots represent DNA (arrow).
