# Supplementary material for: Double-stranded DNA in exosomes: a novel biomarker in cancer detection
Source: PubMed Central journal article supplement — Cell Res. 2014 Apr 8;24(6):766–9. doi: 10.1038/cr.2014.44 (PMC4042169; doi:10.1038/cr.2014.44), 2014-04-08
Supplement: cr201444x5.pdf [file cr201444x5.pdf]

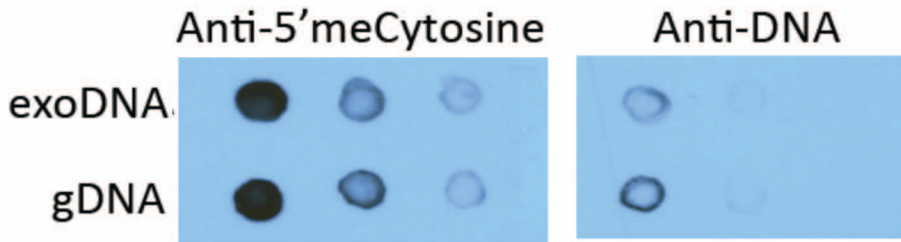

Supplementary information, Figure S5 ExoDNA methylation levels are comparable to those of gDNA. Dot blotted DNA was probed with an anti-5' methylcytosine antibody to determine the cytosine methylation level of exoDNA vs. gDNA. Probing of the same blot with anti-DNA antibody serves as a loading control.
