# Supplementary material for: Double-stranded DNA in exosomes: a novel biomarker in cancer detection
Source: PubMed Central journal article supplement — Cell Res. 2014 Apr 8;24(6):766–9. doi: 10.1038/cr.2014.44 (PMC4042169; doi:10.1038/cr.2014.44), 2014-04-08
Supplement: cr201444x6.pdf [file cr201444x6.pdf]

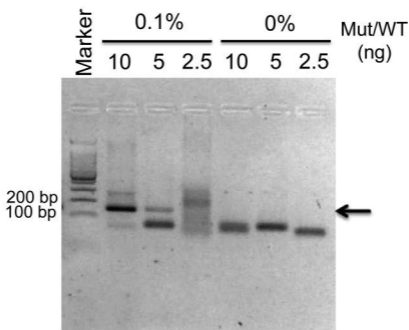

Supplementary information, Figure S6 Evaluation of the sensitivity and specificity of AS-PCR assay for *BRAF(V600E)* mutation detection. gDNA containing no *BRAF(V600E)* mutation or 0.1% of this mutation was used as a template for AS-PCR to assess the sensitivity and specificity of the assay. Different amounts of template DNA (as low as 2.5 ng) were examined. Arrow indicates the expected PCR products.
